# Supplementary material
Source: PubMed Central journal article supplement (PMC4133305)
Supplement: NIHMS595289-supplement-595289.pdf [file NIHMS595289-supplement-595289.pdf]

Supplementary Table. Baseline characteristics of men who completed urinary history assessment at baseline and after one-year of follow-up by intervention group.

|                                    | <b>Total (N=1910)</b>              | <b>ILI (N=968)</b>                 | <b>DSE (N=942)</b>                 | <b>p-value**</b> |
|------------------------------------|------------------------------------|------------------------------------|------------------------------------|------------------|
|                                    | <b>Mean (SD) or<br/>number (%)</b> | <b>Mean (SD) or<br/>number (%)</b> | <b>Mean (SD) or<br/>number (%)</b> |                  |
| Age (years)                        | 59.9 (6.7)                         | 59.9 (6.6)                         | 60.0 (6.7)                         | 0.74             |
| Race/ethnicity                     |                                    |                                    |                                    | 0.65 ***         |
| Non-Hispanic White                 | 1456 (76.2)                        | 733 (75.7)                         | 723 (76.8)                         |                  |
| African-American                   | 172 (9.0)                          | 88 (9.1)                           | 84 (8.9)                           |                  |
| Hispanic                           | 174 (9.1)                          | 89 (9.2)                           | 85 (9.0)                           |                  |
| Native American                    | 53 (2.8)                           | 30 (3.1)                           | 23 (2.4)                           |                  |
| Asian                              | 15 (0.8)                           | 10 (1.0)                           | 5 (0.5)                            |                  |
| Other/mixed                        | 40 (2.1)                           | 18 (1.9)                           | 22 (2.3)                           |                  |
| Education                          |                                    |                                    |                                    | 0.64             |
| < high school                      | 66 (3.5)                           | 37 (3.9)                           | 29 (3.2)                           |                  |
| High school graduate or equivalent | 221 (11.8)                         | 116 (12.1)                         | 105 (11.4)                         |                  |
| College graduate                   | 1592 (84.7)                        | 808 (84.1)                         | 784 (85.4)                         |                  |
| BMI (kg/m <sup>2</sup> )           |                                    |                                    |                                    | 0.47             |
| < 30                               | 315 (16.5)                         | 154 (15.9)                         | 161 (17.1)                         |                  |
| 30-34                              | 764 (40.0)                         | 395 (40.8)                         | 369 (39.2)                         |                  |
| 35-39                              | 487 (25.5)                         | 236 (24.4)                         | 251 (26.7)                         |                  |
| 40+                                | 344 (18.0)                         | 183 (18.9)                         | 161 (17.1)                         |                  |
| Waist circumference (cm)           | 118.5 (13.5)                       | 118.6 (14.0)                       | 118.3 (13.0)                       | 0.65             |
| Systolic blood pressure (mmHg)     | 128.4 (16.5)                       | 127.8 (16.5)                       | 129.1 (16.5)                       | 0.09             |
| Diastolic blood pressure (mmHg)    | 73.2 (9.2)                         | 72.9 (9.07)                        | 73.5 (9.3)                         | 0.13             |
| Maximal fitness (METS)*            | 8.0(2.1)                           | 7.9 (2.1)                          | 8.0 (2.1)                          | 0.59             |
| Beck Depression Inventory          |                                    |                                    |                                    | 0.41             |
| 0-2                                | 689 (36.1)                         | 353 (36.5)                         | 336 (35.7)                         |                  |
| 3-5                                | 578 (30.3)                         | 286 (29.6)                         | 292 (31.1)                         |                  |
| 6-9                                | 397 (20.8)                         | 194 (20.0)                         | 203 (21.6)                         |                  |
| 10+                                | 243 (12.7)                         | 134 (13.9)                         | 109 (11.6)                         |                  |
| Diabetes duration (years)          |                                    |                                    |                                    | 0.39             |
| 0-<2                               | 300 (15.8)                         | 163 (17.0)                         | 137 (14.6)                         |                  |
| 2-<6                               | 683 (36.0)                         | 342 (35.6)                         | 341 (36.3)                         |                  |
| 6-<10                              | 373 (19.6)                         | 178 (18.5)                         | 195 (20.8)                         |                  |
| 10+                                | 544 (28.6)                         | 278 (28.9)                         | 266 (28.3)                         |                  |
| Retinopathy                        | 181 (9.5)                          | 94 (9.7)                           | 87 (9.2)                           | 0.72             |
| Peripheral neuropathy              | 22 (1.2)                           | 10 (1.0)                           | 12 (1.3)                           | 0.62             |
| A1C (%)                            | 7.3 (1.2)                          | 7.2 (1.2)                          | 7.3 (1.2)                          | 0.05             |
| Sleep apnea                        | 353 (18.5)                         | 186 (9.8)                          | 167 (17.8)                         | 0.40             |
| Smoking status                     |                                    |                                    |                                    | 0.37             |
| Never                              | 729 (38.3)                         | 357 (37.0)                         | 372 (39.7)                         |                  |
| Past                               | 1096 (57.6)                        | 565 (58.5)                         | 531 (56.6)                         |                  |
| Current                            | 79 (4.2)                           | 44 (4.6)                           | 35 (3.7)                           |                  |
| Any alcohol in past year           | 1358 (71.1)                        | 681 (70.4)                         | 677 (71.9)                         | 0.46             |
| <b>Weakly or greater UI</b>        | <b>200 (10.5)</b>                  | <b>109 (11.3)</b>                  | <b>91 (9.7)</b>                    | <b>0.25</b>      |
| <b>Nocturia (≥2/night)</b>         | <b>725 (40.0)</b>                  | <b>365 (37.7)</b>                  | <b>360 (38.2)</b>                  | <b>0.82</b>      |

|                                                           |                   |                   |                   |             |
|-----------------------------------------------------------|-------------------|-------------------|-------------------|-------------|
| <b>Increased Daytime Voiding(<math>\geq 8</math>/day)</b> | <b>352 (18.4)</b> | <b>167 (17.3)</b> | <b>185 (19.6)</b> | <b>0.18</b> |
|-----------------------------------------------------------|-------------------|-------------------|-------------------|-------------|

\* METS = metabolic equivalents

\*\* Based on chi-square tests for categorical data and t tests for continuous.

\*\* \*Collapsed to four groups (non-Hispanic White, African-American, Hispanic, and Other/mixed).
